# Supplementary material for: Immunoscreening of Plasmodium falciparum proteins expressed in a wheat germ cell-free system reveals a novel malaria vaccine candidate
Source: PubMed Central journal article supplement (PMC5380959; doi:10.1038/srep46086), 2017-04-05

## Supplementary Information

### **Immunoscreening of *Plasmodium falciparum* proteins expressed in a wheat germ cell-free system reveals a novel malaria vaccine candidate**

Masayuki Morita<sup>1</sup>, Eizo Takashima<sup>1\*</sup>, Daisuke Ito<sup>1</sup>, Kazutoyo Miura<sup>2</sup>, Amporn Thongkuiatkul<sup>3</sup>, Ababacar Diouf<sup>2</sup>, Rick M. Fairhurst<sup>2</sup>, Mahamadou Diakite<sup>4</sup>, Carole A. Long<sup>2</sup>, Motomi Torii<sup>5</sup>, and Takafumi Tsuboi<sup>1</sup>

<sup>1</sup>Division of Malaria Research, Proteo-Science Center, Ehime University, Matsuyama, Ehime, 790-8577, Japan.

<sup>2</sup>Laboratory of Malaria and Vector Research, National Institute of Allergy and Infectious Disease, National Institutes of Health, Rockville, Maryland, 20852, USA.

<sup>3</sup>Department of Biology, Faculty of Science, Burapha University, Chonburi, 20131, Thailand.

<sup>4</sup>Malaria Research and Training Centre, Faculty of Medicine, Pharmacy and Odonto-stomatology, University of Sciences, Techniques, and Technologies of Bamako, Point G, BP 1805, Mali.

<sup>5</sup>Division of Molecular Parasitology, Proteo-Science Center, Ehime University, Shitsukawa, Toon, Ehime, 791-0295, Japan.

\*Corresponding Author, Email:[takashima.eizo.mz@ehime-u.ac.jp](mailto:takashima.eizo.mz@ehime-u.ac.jp)

## **Materials and methods for supplementary information**

### **Synthesis of recombinant LSA3-N protein and production of rabbit antiserum**

As previously described <sup>1</sup>, we generated rabbit polyclonal antiserum against LSA3-N (N<sub>65</sub> to T<sub>749</sub> of the 3D7 sequence; PF3D7\_0220000). The antigen was synthesized by WGCFS and purified by GST tag fused with the N-terminus of the recombinant protein. For control of western blotting, GST-tag was removed with TEV-protease digestion at TEV protease site located between GST-tag and LSA3-N.

### **MS analysis**

Immunoprecipitation was carried out as previously described <sup>2</sup>. Briefly, proteins were extracted from late schizont parasite pellets in TNE buffer (50 mM Tris-HCl, 0.2 M NaCl, 5 mM EDTA) with 0.5 % Nonidet P-40 containing cOmplete<sup>TM</sup> protease inhibitor (Roche). Seventy five microliter samples of supernatants were pre-incubated at 4°C for 1 h with 36 µl of 50% protein G-conjugated beads (protein G-Sepharose 4 Fast Flow; GE Healthcare) in TNE buffer. Aliquots of recovered supernatants were incubated with 3 µl of rabbit anti-LSA3-C serum or rabbit anti-GST serum at 4°C for 2 h, and then 18 µl of a 50% protein G-conjugated bead suspension was added. After incubation for 2 h at 4°C, the beads were washed three times with TNE buffer. Finally, proteins were extracted from the protein G-conjugated beads by incubation with 1× SDS-PAGE reducing loading buffer at 95°C for 5 min, and subjected to SDS-PAGE. Protein bands were excised from gels and subjected to in-gel digestion with sequence-grade modified trypsin (Promega), as previously described <sup>3</sup>. Tryptic digests were reconstituted with 0.2 % (v/v) trifluoroacetic acid for mass spectrometric analysis. Peptide mass fingerprint (PMF) analysis was performed using a MALDI-TOF/TOF mass spectrometer (Shimadzu AXIMA-TOF2). MS spectrum data were submitted to the MS-Fit (<http://prospector.ucsf.edu>) in order to identify peptides derived from LSA3. The conditions of the search were as follows; Database searched, amino-acid sequence of LSA3 (PF3D7\_0220000); Max number of missed cleavages, 1; Constant

modification, Propionamide (C); Considered modifications, Peptide N-terminal Gln to pyroGlu, Oxidation of Met, and Protein N-terminus acetylated; MOWSE P factor, 0.4.

**Table S1 (Supplementary dataset file)**

**Information on 1,827 proteins in the library expressed by WGCFS.** Cloning method: PCR indicates that the PCR product was cloned into the TA-cloning vector. cDNA designates a clone from a full-length cDNA library. Restriction enzyme represents targets insert cloned into the expression vector for WGCFS.

**Table S2 (Supplementary dataset file)**

**Result of the statistical analysis of the immunoreactive 325 proteins with TM and/or SP.** Cloning method: PCR indicates the PCR product was cloned into TA-cloning vector. cDNA designates a clone from full-length cDNA library. Restriction enzyme represents target insert cloned into the expression vector for WGCFS. *r* represents the Pearson correlation coefficient. CI lower and CI upper show lower and upper boundaries of confidence intervals, respectively. Adjusted P-value was calculated by Benjamini-Hochberg's correction for 325 multiple comparisons.

**Figure legends**

**Figure S1**

**Schematic presentation of AlphaScreen-based measurement of antigen-antibody response.** Human IgG is incubated with mono-biotinylated recombinant plasmodial protein. Following the incubation, the streptavidin conjugated donor beads and protein G conjugated acceptor beads are added to the mixture. When the immune-complex is formed, the excitation of the donor beads causes the release of singlet oxygen molecules that trigger the light emission at 520-620 nm from the acceptor beads.

**Figure S2**

**Distribution of GIA activity of the Malian adult IgG against 3D7 strain.**

GIA activities against *P. falciparum* 3D7 strain parasites were measured as described in Materials and Methods using Malian adult IgGs (n=51).

### **Figure S3**

**Purified C-terminal His-tagged recombinant LSA3-C protein visualized by Coomassie brilliant blue staining following SDS-PAGE.**

### **Figure S4**

**Western blot analysis with anti-LSA3-N and C antibodies.** Western blot was performed with (a) rabbit anti-LSA3-N serum (1:1000) and (b) rabbit LSA3-C rabbit IgG (0.43  $\mu\text{g/ml}$ ). Parasite lysate was obtained from *P. falciparum* infected red cells at mixed developmental stages. LSA3-N (0.25 ng) at the lane 1, LSA3-C (0.25 ng) at the lane 2, and blood-stage parasite lysate derived from  $2 \times 10^5$  cells at the lane 3 were separated by SDS-PAGE under reducing conditions.

### **Figure S5**

**MS analysis of the protein band immunoprecipitated with anti-LSA3-C antibody.**

**a)** Molecular weight marker (Lane 1), immunoprecipitated sample using rabbit anti His-GST serum (Lane 2, negative control), and rabbit anti LSA3-C serum (Lane 3) were separated by SDS-PAGE under reducing conditions. The gel was stained by CBB. Protein bands indicated by arrow heads were excised for MS analysis. PMFs derived from the 2 samples were compared, then peptides specifically detected from the lane 3 were subjected to database search (jPOSTrepo ID # JPST000238). **b)** Amino acid sequence of LSA3. Out of 7 peptides specifically detected at the sample from the lane 3, 6 peptides were matched with LSA3 sequence. PMF matched peptides were indicated in red font.

### **Figure S6**

**Immunofluorescence analysis of schizont parasites using rabbit anti-LSA3-C antibody.** Rabbit anti-LSA3-C antibody was utilized for the IFA. Mouse anti-AMA1,

-RAP1, -RON2, or -RESA antibodies were used for counter-staining to determine subcellular localization of microneme, rhoptry body, rhoptry neck or dense granules, respectively. Parasite nuclei were stained by DAPI. Scale bars indicate 5  $\mu\text{m}$ .

### **Figure S7**

**Immunofluorescence analysis of ring stage parasites using rabbit anti-LSA3-C antibody.** Rabbit anti-LSA3-C antibody was used for the IFA. Mouse anti-RAP1 antibody was used for counter-staining to determine subcellular localization of the parasitophorous vacuole (PV). Parasite nuclei were stained by DAPI. Scale bar indicates 5  $\mu$ m.

## Reference

- 1 Ito, D. *et al.* RALP1 is a rhoptry neck erythrocyte-binding protein of *Plasmodium falciparum* merozoites and a potential blood-stage vaccine candidate antigen. *Infect Immun* **81**, 4290-4298, doi:10.1128/IAI.00690-13 (2013).
- 2 Ito, D. *et al.* Plasmodial ortholog of *Toxoplasma gondii* rhoptry neck protein 3 is localized to the rhoptry body. *Parasitol Int* **60**, 132-138 (2011).
- 3 Ohnuki, H. *et al.* BAZF, a novel component of cullin3-based E3 ligase complex, mediates VEGFR and Notch cross-signaling in angiogenesis. *Blood* **119**, 2688-2698 (2012).

Figure S1

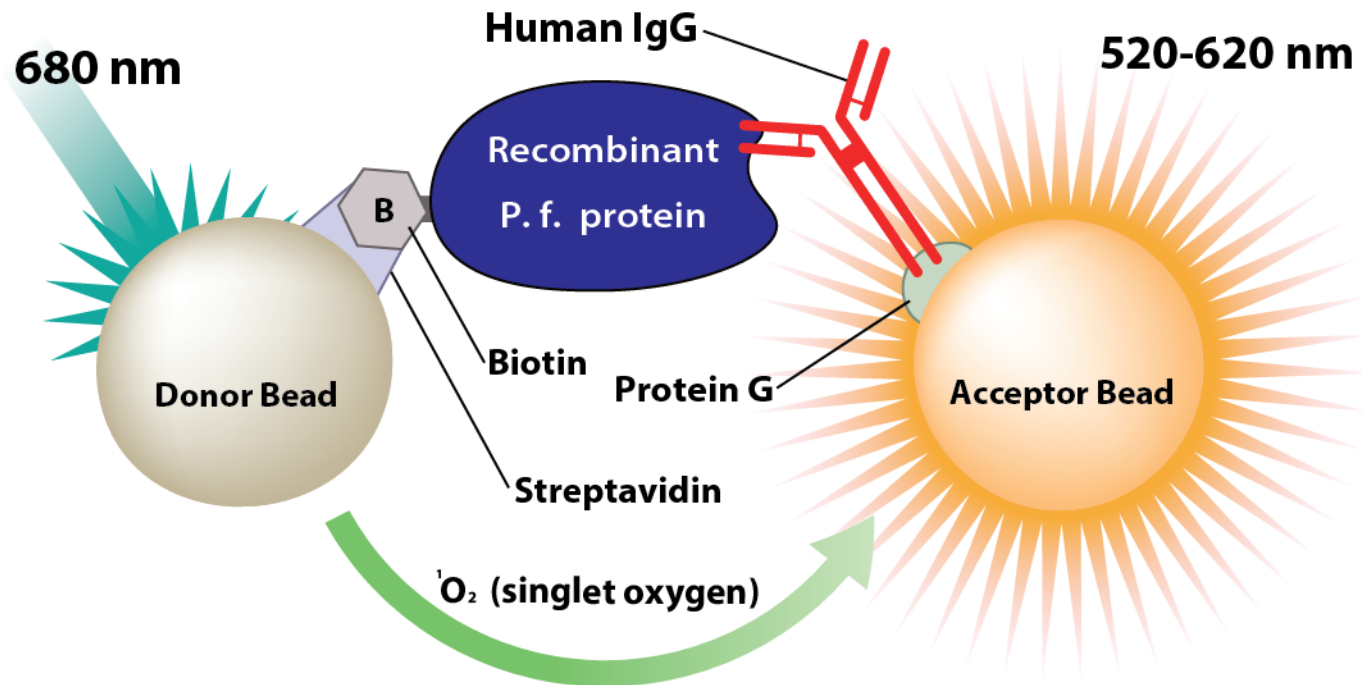

Figure S2

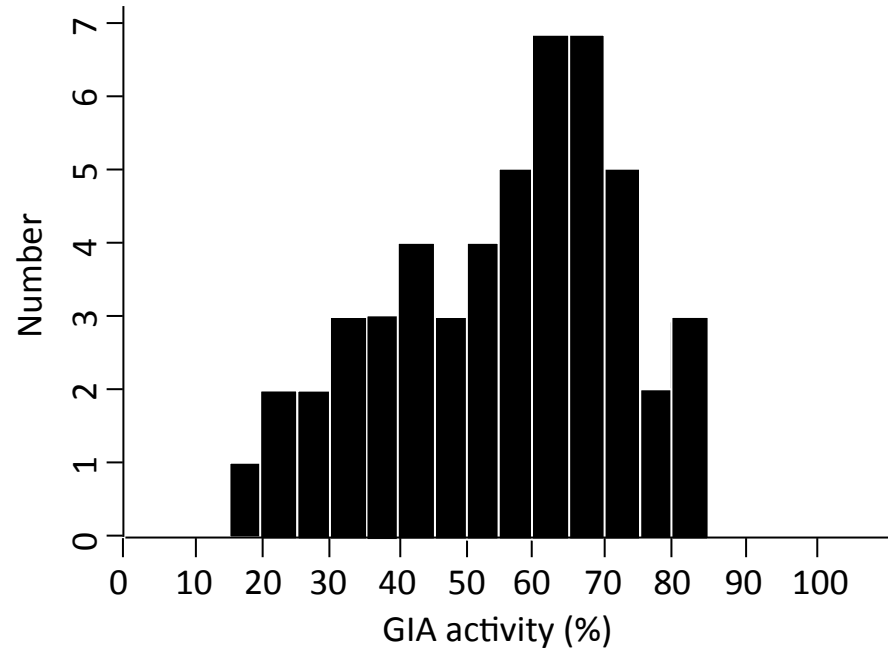

Figure S3

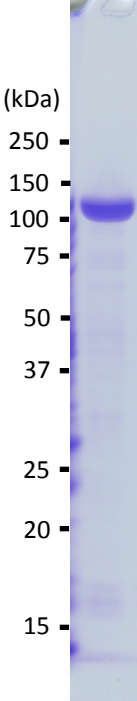



Figure S4

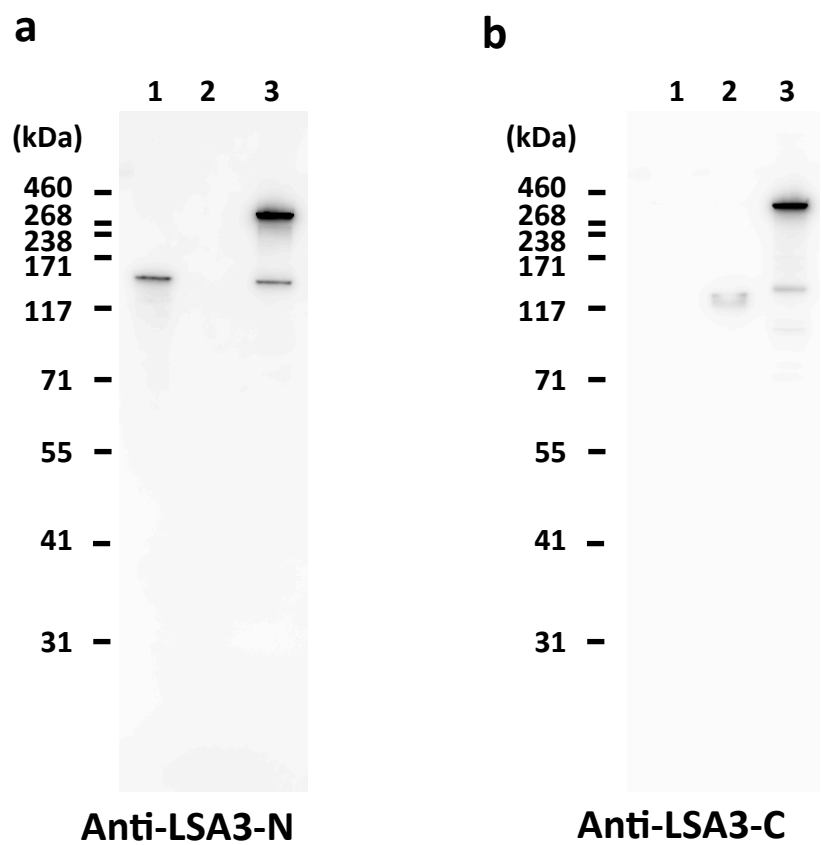

Figure S5 a

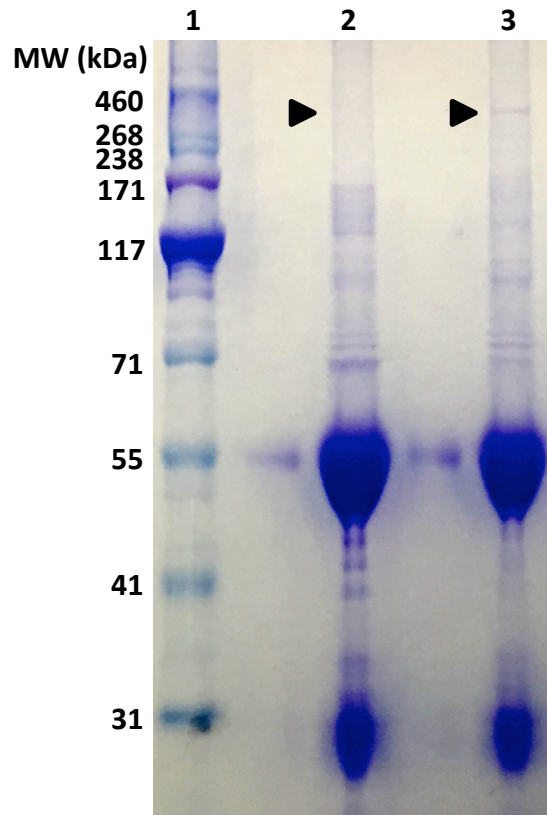

## Fig. S5 b

MTNSNYKSNKTYNENNNEQITTFNRTNMNPIKKCHMREKINKYFFLIKILTCTILIWAVQYANNSDINKSWKKNTYVDKKLNLKFNRLGESQVNGELASEEVKEKILDLLLEEGNTLTE  
SVDDNKNLEEAEDIKENILLSNIEEPKENIIDNLLNIGQNSEKQESVSENVQVSEDLFNELLNSVDVNGEVKENILEESQVNDIFNSLVKSVQQEQQHNVEEKVEESVEENDEESVEEN  
VEENVEENDDSEVASSVEESIASSVDESIDSSIEENVAPTVEEIVAPTVEEIVAPSVVESVAPSVEESVEENVEESVAENVEESVAENVEESVAENVEESVAENVEESVAENVE  
EIVAPTVEESVAPTVEEIVAPSVEESVAPSVVEEIVVPTVEESVAENVEEIVAPSVVEEIVAPSVVEEIVAPTVEESVAPTVEEIVAPSVVEESVAPSVVEEIVVPTVEESVAENVEESVAENVEEIVAPS  
VEEIVAPSVVEEIVAPSVVEEIVAPSVVEEIVAPSVVEEIVAPSVVEEIVAPSVVEEIVAPSVVEEIVAPTVEEIVAPTVEEIVAPSVVEEIVAPTVEESVAENVATNLSNLLSLLGGIETEEIKDSILNEIEEV  
KENVVTTILENVEETTAESVTTFSNILEEIQENTITNDTIEEKLEELHENVLSAALENTQSEEEKKEVIDVIEEVKEEVATTLIETVEQAEESASTITEIFENLEENAVESNENVAENLEKLNETH  
FNTVLDKVEETVEISGESLENNEMDKAFFSEIFDNVKGIQENLLTGMFRSIETSIVIQSEEKVDLNNVSSILDNIENMKEGLLNKLENISSTEGVQETVTEHVEQNVYVDVDPAMKDQ  
FLGILNEAGGLKEMFFNLEDVFKSESDVITVEEIKDEPVQKEVEKETVSIIEEMEENIVDVLEEEKEDLTDK MIDAVEESIEISSDSKEETESIKDKEKDVSLVVEEVQDNDMDSEVKEVLELK  
NMEEELMKDAVEINDITSKLIETQELNEVEADLIKMEKLEKALEKSEDSKEIIDAKDDTLEKVEEEHDITTTLDEVVELKDVEEDKIEKVSDLKDLEEDILKEVKEIKELESEILEDYKELKTI  
ETDILEEKKEIEKDHFEKFEAAAEEIKDLEADILKEVSSLEVEEEKLEEVHELKEEVEHIISGDAHIKGLEEDDLEEVDDLKGSILDMLKGMELGDMDKESLEDVTAKLGERVESLKDVLSS  
ALGMDEEQMKTRKKAQRPKLEEVLLKEEVKEEPKKKITKKKVRFDIKDKEPKDEIVEVEMKDEDIDEDIEEDVEEDIEEDKVEDIDEDIDEDIDEDIGEDKDEVIDLIVQKEKRIEKVKEKKK  
KLEKKVEEGVSGLKKHVDEVMKYVQKIDKEVDKEVSKALESKNDVTNLKQNQDFFSKVKNFVKKYKVFAPFISAVAAAFASYVVGFFTFSLFSSCVTIASSTYLLSKVDKTINKNKERPFY  
SFVFDIFKNLKHYLQMQMKEKFSKEKNNNVIEVTNKAEEKGNVQVTNKTEKTTKVDKNNKVPKKSRTQKSK

Figure S6

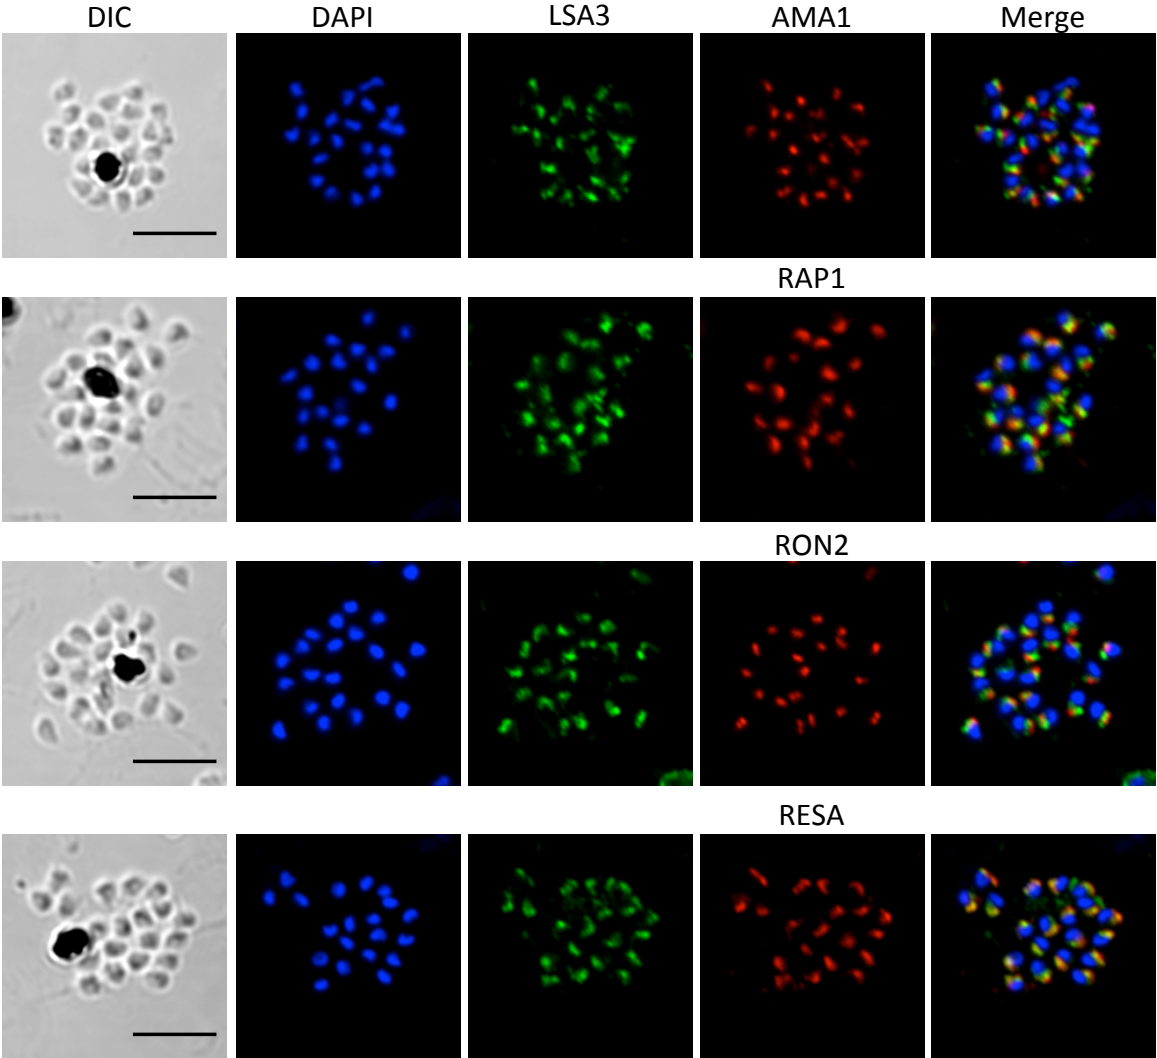

Figure S7

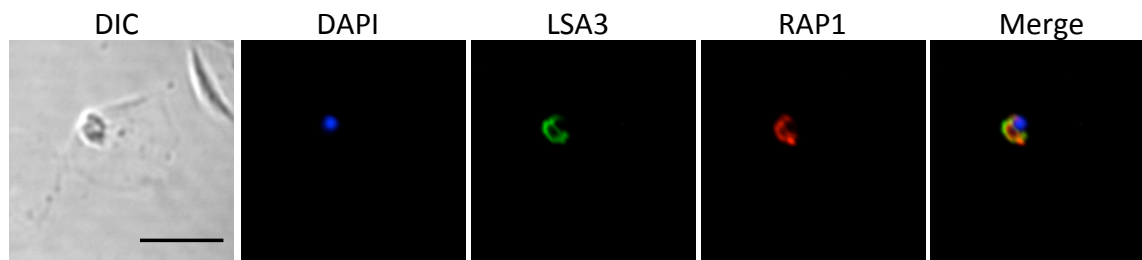

Supplement: srep46086-s1.pdf [file srep46086-s1.pdf]
